# Supplementary material
Source: ML conference proceedings conference paper supplement (https://openaccess.thecvf.com/content/ICCV2021/html/Li_From_Contexts_to_ICCV_2021_paper.html)
Supplement: Supplementary file 1 [file Li_From_Contexts_to_ICCV_2021_supplemental.zip]

Archive with 1 entries (1 files):
- 03419_supp.pdf
